# Supplementary material
Source: publisher figshare collection journal article supplement (https://springernature.figshare.com/articles/dataset/_/9202466)
Supplement: Supplementary file [file 16758527]

**Supplementary Material I: Modified HIV knowledge assessment tool**

For each statement, please circle “True” (T), “False” (F), or “I don’t know” (DK). If you do not know, please do not guess, please circle “DK”.

| Qn | Item                                                                                             | True | False | I don't know |
|----|--------------------------------------------------------------------------------------------------|------|-------|--------------|
| 1  | Coughing and sneezing DO NOT spread HIV.                                                         | T    | F     | DK           |
| 2  | A person can get HIV by sharing a cup of water or a meal with someone who has HIV.               | T    | F     | DK           |
| 3  | Washing private parts after sex keeps a person from getting HIV                                  | T    | F     | DK           |
| 4  | All pregnant women infected with HIV will have babies born with HIV                              | T    | F     | DK           |
| 5  | People who have been infected with HIV quickly show serious signs of being infected              | T    | F     | DK           |
| 6  | There is medicine that can cure HIV                                                              | T    | F     | DK           |
| 7  | A woman can NOT get HIV if she has sex with an infected person during her periods                | T    | F     | DK           |
| 8  | There is a female condom that can help decrease a woman's chance of getting HIV                  | T    | F     | DK           |
| 9  | Using a condom can prevent someone from getting HIV                                              | T    | F     | DK           |
| 10 | Having sex with more than one partner can increase a person's chance of being infected with HIV. | T    | F     | DK           |
| 11 | Taking a test for HIV one week after having sex will tell a person if she or he has HIV.         | T    | F     | DK           |
| 12 | A person can get HIV by sharing a latrine, bathroom with a person who has HIV                    | T    | F     | DK           |
| 13 | Being circumcised decreases the chances of getting HIV                                           | T    | F     | DK           |
| 14 | There is medicine that can help someone with HIV to live longer                                  | T    | F     | DK           |

\*Source: Modified tool guided by Carey & Schroder (2002), HIV-KQ-18. Internal consistency across samples (alphas = 0.75 to 0.89).
